# Supplementary material for: Efficient separation of oil–phenol mixtures and removal of neutral oil entrainment via an in situ deep eutectic method
Source: Royal Society of Chemistry journal article supplement (doi:10.1039/d4gc05756b), 2024-12-24
Supplement: d4gc05756b1.pdf [file d4gc05756b1.pdf]

## Supporting material

### **Efficient separation of oil-phenol mixtures and removal of neutral oil entrainment by an in-situ deep eutectic method**

Wanxiang Zhang<sup>1</sup>, Yangchangqing Zhao<sup>1</sup>, Bingru Wang<sup>1</sup>, Zhigang Lei<sup>1</sup>, Shuhang Ren<sup>1</sup>, Yucui Hou<sup>2</sup>, Weize Wu<sup>1,\*</sup>

<sup>1</sup> *State Key Laboratory of Chemical Resource Engineering, College of Chemical Engineering, Beijing University of Chemical Technology, Beijing 100029, China*

<sup>2</sup> *College of Chemistry and Materials, Taiyuan Normal University, Shanxi 030619, China*

---

Additional Supporting Information may be found in the online version of this article.

\*Correspondence concerning this article should be addressed to W. Wu at [wzww@mail.buct.edu.cn](mailto:wzww@mail.buct.edu.cn)

## Content

### A1 Molecular dynamics simulation details

**Table S1.** Compounds and compositions of 180-200 °C coal liquefaction oil.

**Table S2.** Experimental Reagents Information.

**Table S3.** Partial charges of different atoms in the molecule species.

**Table S4.** Lennard-Jones parameters used for [Emim]<sup>+</sup>, [Ch]<sup>+</sup>, [Cl]<sup>-</sup>, Gly, MCR, THN and UND.

**Table S5.** Bonded parameters used for [Emim]<sup>+</sup>, [Ch]<sup>+</sup>, Gly, MCR, THN and UND.

**Table S6.** Experimental initial feed composition and considered number of molecules in MD simulations.

**Table S7.** LLE data of MCR(1) - THN(2) - UND(3) - EmimCl(4).

**Table S8.** Binary interaction parameters  $\Delta b_{ij}$ ,  $\Delta b_{ji}$  for NRTL model.

**Table S9.** Modified Group Contribution method.

**Table S10.** Physical properties of the EmimCl at 25 °C and atmospheric pressure.

**Table S11.** Basis of economics and equipment sizing.

**Table S12.** Data of FIG. 2(A).

**Table S13.** The lowest molar ratio of liquid DES synthesized by various HBA and MCR at 25 °C.

**Table S14.** The interaction energy between molecules in different systems.

**Table S15.** Atomic contribution to dispersion energy.

**Fig. S1.** The experimental and MD simulated density values of EmimCl at 25 °C (Experiment: 1.123, MD: 1.138).

**Fig. S2.** Dispersion energy density diagram of EmimCl (A), ChCl (B), Gly (C), MCR (D), THN (E), UND (F), and their reference atoms in RDF analysis.

The numbers of pages, tables, and figures are 24, 15 and 2, respectively.

## **A1 Molecular dynamics simulation details**

The GROMACS 2019.1 software package was used to perform MD simulations to determine the molecular-level separation mechanism of DES from MNU. The molecules were randomly distributed in the corresponding area of the simulated box. The particle mesh ewald (PME) method was used to accurately calculate the long-distance electrostatic interaction with a cutoff distance of 12 Å. For the study of liquid properties, periodic boundary conditions (PBC) were used to simulate a small number of particles, and to study macroscopic properties through time averaging. In order to accurately calculate and collect simulation data, the equilibrium phase was calculated using Berendsen thermostat and Berendsen barostat at 25 °C and 1 bar, and V-rescale thermostat and Parrinello-Rahman barostat were used to calculate the generated phase. First, the energy of the system was minimized by the steepest descent method, and the minimum system was balanced by the NVT ensemble for 1 ns with a temperature gradient from 0 °C to 25 °C. Then the equilibrium simulation was performed at the isothermal-isobaric ensemble (NPT). Finally, without other constraints, a 50 ns MD simulation was performed in a system with a time step of 2 fs, and the trajectory was analyzed to obtain radial distribution functions (RDFs). The trajectory data was saved every 10 ps, and the trajectory was analyzed and visualized by using VMD software.

**Table S1**

Compounds and compositions of 180-200 °C coal liquefaction oil.

| No. | Molecular formula               | Compound                 | Content/% |
|-----|---------------------------------|--------------------------|-----------|
| 1   | C <sub>9</sub> H <sub>12</sub>  | 4-Ethyltoluene           | 0.78      |
| 2   | C <sub>10</sub> H <sub>18</sub> | Trans-decalin            | 11.78     |
| 3   | C <sub>10</sub> H <sub>18</sub> | Cis-decaline             | 4.69      |
| 4   | C <sub>10</sub> H <sub>14</sub> | 1-Ethyl-2-methyl benzene | 1.14      |
| 5   | C <sub>7</sub> H <sub>8</sub> O | <i>o</i> -Cresol         | 8.11      |
| 6   | C <sub>7</sub> H <sub>8</sub> O | <i>m</i> -Cresol         | 22.55     |
| 7   | C <sub>7</sub> H <sub>8</sub> O | <i>p</i> -Cresol         | 22.55     |
| 8   | C <sub>11</sub> H <sub>24</sub> | Undecane                 | 7.03      |
| 9   | C <sub>9</sub> H <sub>12</sub>  | 3-ethyltoluene           | 5.00      |
| 10  | C <sub>9</sub> H <sub>10</sub>  | Vinyltoluene             | 5.35      |
| 11  | C <sub>10</sub> H <sub>12</sub> | Tetraline                | 8.32      |
| 12  | C <sub>12</sub> H <sub>26</sub> | Dodecane                 | 2.68      |

**Table S2**

Experimental Reagents Information.

| Components                           | Abbreviation | CAS Reg. No. | Purity | Suppliers                                           |
|--------------------------------------|--------------|--------------|--------|-----------------------------------------------------|
| <i>m</i> -Cresol                     | MCR          | 108-39-4     | 99%    | Macklin Biotechnology Co., Ltd.,<br>Shanghai, China |
| Tetrahydronaphthalene                | THN          | 119-64-2     | 98.5%  | Macklin Biotechnology Co., Ltd.,<br>Shanghai, China |
| Undecane                             | UND          | 1120-21-4    | 99.5%  | Macklin Biotechnology Co., Ltd.,<br>Shanghai, China |
| 1-Ethyl-3-methylimidazolium chloride | LC           | 65039-09-0   | 98%    | Macklin Biotechnology Co., Ltd.,<br>Shanghai, China |
| Choline chloride                     | ChCl         | 67-48-1      | 99%    | Aladdin Biotechnology Co., Ltd.,<br>Shanghai, China |
| Glycerol                             | Gly          | 56-81-5      | 99%    | Macklin Biotechnology Co., Ltd.,<br>Shanghai, China |

**Table S3**

Partial charges of different atoms in the molecule species.

| Atom Type | Partial Charge |
|-----------|----------------|-----------|----------------|-----------|----------------|-----------|----------------|
| Emim      |                | THN       |                | UND       |                | Ch        |                |
| N1        | 0.11           | C1        | -0.07          | C1        | -0.25          | C1        | -0.08          |
| C1        | -0.13          | C2        | 0.05           | C2        | 0.21           | N1        | 0.04           |
| C2        | -0.18          | C3        | 0.05           | C3        | 0.01           | C2        | 0.26           |
| C3        | -0.04          | C4        | -0.08          | C4        | 0.03           | C3        | -0.33          |
| N2        | 0.26           | C5        | 0.07           | C5        | 0.10           | C4        | -0.41          |
| C4        | -0.18          | C6        | -0.20          | C6        | 0.04           | C5        | -0.33          |
| C5        | -0.08          | C7        | -0.13          | C7        | 0.10           | O1        | -0.61          |
| C6        | -0.35          | C8        | -0.13          | C8        | 0.03           | H1        | 0.14           |
| H1        | 0.22           | C9        | -0.20          | C9        | 0.01           | H2        | 0.14           |
| H2        | 0.24           | C10       | 0.07           | C10       | 0.21           | H3        | 0.01           |
| H3        | 0.10           | H1        | 0.03           | C11       | -0.25          | H4        | 0.01           |
| H4        | 0.10           | H2        | 0.03           | H1        | 0.05           | H5        | 0.18           |
| H5        | 0.23           | H3        | -0.01          | H2        | 0.05           | H6        | 0.18           |
| H6        | 0.06           | H4        | -0.01          | H3        | 0.05           | H7        | 0.18           |
| H7        | 0.06           | H5        | -0.01          | H4        | -0.04          | H8        | 0.20           |
| H8        | 0.06           | H6        | -0.01          | H5        | -0.04          | H9        | 0.20           |
| H9        | 0.17           | H7        | 0.03           | H6        | -0.02          | H10       | 0.20           |
| H10       | 0.17           | H8        | 0.03           | H7        | -0.02          | H11       | 0.18           |
| H11       | 0.17           | H9        | 0.12           | H8        | -0.03          | H12       | 0.18           |
| MCR       |                | H10       | 0.12           | H9        | -0.03          | H13       | H13            |
| C1        | -0.37          | H11       | 0.12           | H10       | -0.04          | H14       | 0.44           |
| C2        | 0.34           | H12       | 0.12           | H11       | -0.04          | Gly       |                |
| C3        | -0.43          |           |                | H12       | -0.03          | C1        | 0.16           |
| C4        | 0.47           |           |                | H13       | -0.03          | C2        | 0.10           |
| C5        | -0.40          |           |                | H14       | -0.04          | C3        | 0.13           |
| C6        | -0.01          |           |                | H15       | -0.04          | O1        | -0.61          |
| H1        | 0.16           |           |                | H16       | -0.03          | O2        | -0.58          |
| H2        | 0.20           |           |                | H17       | -0.03          | O3        | -0.58          |
| H3        | 0.16           |           |                | H18       | -0.02          | H1        | 0.01           |
| H4        | 0.12           |           |                | H19       | -0.02          | H2        | 0.01           |

|    |       |     |       |    |      |
|----|-------|-----|-------|----|------|
| C7 | -0.33 | H20 | -0.04 | H3 | 0.09 |
| H5 | 0.09  | H21 | -0.04 | H4 | 0.05 |
| H6 | 0.09  | H22 | 0.05  | H5 | 0.05 |
| H7 | 0.09  | H23 | 0.05  | H6 | 0.41 |
| O1 | -0.58 | H24 | 0.05  | H7 | 0.39 |
| H8 | 0.40  |     |       | H8 | 0.39 |

---

**Table S4**Lennard-Jones parameters used for [Emim]<sup>+</sup>, [Ch]<sup>+</sup>, [Cl]<sup>-</sup>, Gly, MCR, THN and UND.

| Atom Type           | $\epsilon$ (kcal/mol) | $\sigma$ | Atom Type         | $\epsilon$ (kcal/mol) | $\sigma$ |
|---------------------|-----------------------|----------|-------------------|-----------------------|----------|
| [Emim] <sup>+</sup> |                       |          | Gly               |                       |          |
| na                  | 0.3250                | 0.7113   | c3                | 0.3400                | 0.4577   |
| cc                  | 0.3400                | 0.3598   | oh                | 0.3066                | 0.8803   |
| c3                  | 0.3400                | 0.4577   | h1                | 0.2471                | 0.0657   |
| cd                  | 0.3400                | 0.3598   | ho                | 0.0000                | 0.0000   |
| h5                  | 0.2421                | 0.0628   | MCR               |                       |          |
| h4                  | 0.2511                | 0.0628   | ca                | 0.3400                | 0.3598   |
| h1                  | 0.2471                | 0.0657   | ha                | 0.2600                | 0.0628   |
| hc                  | 0.2650                | 0.0657   | c3                | 0.3400                | 0.4577   |
| [Ch] <sup>+</sup>   |                       |          | hc                | 0.2650                | hc       |
| c3                  | 0.3400                | 0.4577   | oh                | 0.3066                | 0.8803   |
| n4                  | 0.3250                | 0.7113   | ho                | 0.0000                | 0.0000   |
| oh                  | 0.3066                | 0.8803   | THN               |                       |          |
| hx                  | 0.1960                | 0.0657   | c3                | 0.3400                | 0.4577   |
| h1                  | 0.2471                | 0.0657   | ca                | 0.3400                | 0.3598   |
| UND                 |                       |          | ha                | 0.2600                | hc       |
| c3                  | 0.3400                | 0.4577   | ha                | 0.2600                | 0.0628   |
| hc                  | 0.2650                | 0.0657   | [Cl] <sup>-</sup> |                       |          |
|                     |                       |          | cl                | 0.3471                | 1.1088   |



**Table S5**Bonded parameters used for [Emim]<sup>+</sup>, [Ch]<sup>+</sup>, Gly, MCR, THN and UND.

| Bonds-Type | <i>r</i>            | <i>k</i> |
|------------|---------------------|----------|
|            | [Emim] <sup>+</sup> |          |
| N1 - C1    | 0.1380              | 356310   |
| N1 - C2    | 0.1380              | 356310   |
| N1 - C3    | 0.1463              | 274220   |
| C1 - N2    | 0.1380              | 356310   |
| C1 - H1    | 0.1082              | 294300   |
| C2 - C4    | 0.1373              | 419150   |
| C2 - H2    | 0.1082              | 294550   |
| C3 - C5    | 0.1538              | 251790   |
| C3 - H3    | 0.1097              | 276650   |
| C3 - H4    | 0.1097              | 276650   |
| N2 - C4    | 0.1380              | 356310   |
| N2 - C6    | 0.1463              | 274220   |
| C4 - H5    | 0.1082              | 294550   |
| C5 - H6    | 0.1097              | 276650   |
| C5 - H7    | 0.1097              | 276650   |
| C5 - H8    | 0.1097              | 276650   |
| C6 - H9    | 0.1097              | 276650   |
| C6 - H10   | 0.1097              | 276650   |
| C6 - H11   | 0.1097              | 276650   |
|            | [Ch] <sup>+</sup>   |          |
| C1 - N1    | 0.1511              | 237070   |
| C1 - C2    | 0.1538              | 251790   |
| C1 - H1    | 0.1091              | 283420   |
| C1 - H2    | 0.1091              | 283420   |
| N1 - C3    | 0.1511              | 237070   |
| N1 - C4    | 0.1511              | 237070   |
| N1 - C5    | 0.1511              | 237070   |
| C2 - O1    | 0.1423              | 265010   |
| C2 - H3    | 0.1097              | 276650   |
| C2 - H4    | 0.1097              | 276650   |
| C3 - H5    | 0.1091              | 283420   |
| C3 - H6    | 0.1091              | 283420   |
| C3 - H7    | 0.1091              | 283420   |
| C4 - H8    | 0.1091              | 283420   |
| C4 - H9    | 0.1091              | 283420   |
| C4 - H10   | 0.1091              | 283420   |
| C5 - H11   | 0.1091              | 283420   |
| C5 - H12   | 0.1091              | 283420   |

|          |        |        |
|----------|--------|--------|
| C5 - H13 | 0.1091 | 283420 |
| O1 - H14 | 0.0973 | 310790 |
| Gly      |        |        |
| C1 - C2  | 0.1538 | 251790 |
| C1 - O1  | 0.1423 | 265010 |
| C1 - H1  | 0.1097 | 276650 |
| C1 - H2  | 0.1097 | 276650 |
| C2 - C3  | 0.1538 | 251790 |
| C2 - O2  | 0.1423 | 265010 |
| C2 - H3  | 0.1097 | 276650 |
| C3 - O3  | 0.1423 | 265010 |
| C3 - H4  | 0.1097 | 276650 |
| C3 - H5  | 0.1097 | 276650 |
| O1 - H6  | 0.0973 | 310790 |
| O2 - H7  | 0.0973 | 310790 |
| O3 - H8  | 0.0973 | 310790 |
| MCR      |        |        |
| C1 - C2  | 0.1398 | 385850 |
| C1 - C6  | 0.1398 | 385850 |
| C1 - H1  | 0.1086 | 289370 |
| C2 - C3  | 0.1398 | 385850 |
| C2 - C7  | 0.1516 | 268610 |
| C3 - C4  | 0.1398 | 385850 |
| C3 - H2  | 0.1086 | 289370 |
| C4 - C5  | 0.1398 | 385850 |
| C4 - O1  | 0.1364 | 321330 |
| C5 - C6  | 0.1398 | 385850 |
| C5 - H3  | 0.1086 | 289370 |
| C6 - H4  | 0.1086 | 289370 |
| C7 - H5  | 0.1097 | 276650 |
| C7 - H6  | 0.1097 | 276650 |
| C7 - H7  | 0.1097 | 276650 |
| O1 - H8  | 0.0973 | 310790 |
| THN      |        |        |
| C1 - C2  | 0.1538 | 251790 |
| C1 - C10 | 0.1516 | 268610 |
| C1 - H1  | 0.1097 | 276650 |
| C1 - H2  | 0.1097 | 276650 |
| C2 - C3  | 0.1538 | 251790 |
| C2 - H3  | 0.1097 | 276650 |
| C2 - H4  | 0.1097 | 276650 |
| C3 - C4  | 0.1538 | 251790 |
| C3 - H5  | 0.1097 | 276650 |
| C3 - H6  | 0.1097 | 276650 |

|           |        |        |
|-----------|--------|--------|
| C4 - C5   | 0.1516 | 268610 |
| C4 - H7   | 0.1097 | 276650 |
| C4 - H8   | 0.1097 | 276650 |
| C5 - C6   | 0.1398 | 385850 |
| C5 - C10  | 0.1398 | 385850 |
| C6 - C7   | 0.1398 | 385850 |
| C6 - H9   | 0.1086 | 289370 |
| C7 - C8   | 0.1398 | 385850 |
| C7 - H10  | 0.1086 | 289370 |
| C8 - C9   | 0.1398 | 385850 |
| C8 - H11  | 0.1086 | 289370 |
| C9 - C10  | 0.1398 | 385850 |
| C9 - H12  | 0.1086 | 289370 |
| <hr/>     |        |        |
| UND       |        |        |
| <hr/>     |        |        |
| C1 - C2   | 0.1538 | 251790 |
| C1 - H1   | 0.1097 | 276650 |
| C1 - H2   | 0.1097 | 276650 |
| C1 - H3   | 0.1097 | 276650 |
| C2 - C3   | 0.1538 | 251790 |
| C2 - H4   | 0.1097 | 276650 |
| C2 - H5   | 0.1097 | 276650 |
| C3 - C4   | 0.1538 | 251790 |
| C3 - H6   | 0.1097 | 276650 |
| C3 - H7   | 0.1097 | 276650 |
| C4 - C5   | 0.1538 | 251790 |
| C4 - H8   | 0.1097 | 276650 |
| C4 - H9   | 0.1097 | 276650 |
| C5 - C6   | 0.1538 | 251790 |
| C5 - H10  | 0.1097 | 276650 |
| C5 - H11  | 0.1097 | 276650 |
| C6 - C7   | 0.1538 | 251790 |
| C6 - H12  | 0.1097 | 276650 |
| C6 - H13  | 0.1097 | 276650 |
| C7 - C8   | 0.1538 | 251790 |
| C7 - H14  | 0.1097 | 276650 |
| C7 - H15  | 0.1097 | 276650 |
| C8 - C9   | 0.1538 | 251790 |
| C8 - H16  | 0.1097 | 276650 |
| C8 - H17  | 0.1097 | 276650 |
| C9 - C10  | 0.1538 | 251790 |
| C9 - H18  | 0.1097 | 276650 |
| C9 - H19  | 0.1097 | 276650 |
| C10 - C11 | 0.1538 | 251790 |
| C10 - H20 | 0.1097 | 276650 |

|           |        |        |
|-----------|--------|--------|
| C10 - H21 | 0.1097 | 276650 |
| C11 - H22 | 0.1097 | 276650 |
| C11 - H23 | 0.1097 | 276650 |
| C11 - H24 | 0.1097 | 276650 |

---

**Table S6**

Experimental initial feed composition and considered number of molecules in MD simulations.

| DESs type  | Number of molecules |     |                   |                 |     |     |     |
|------------|---------------------|-----|-------------------|-----------------|-----|-----|-----|
|            | Ch <sup>+</sup>     | Gly | Emim <sup>+</sup> | Cl <sup>-</sup> | MCR | THN | UND |
| EmimCl:MCR |                     |     | 200               | 200             | 280 | 200 | 100 |
| ChCl:MCR   | 200                 |     |                   | 200             | 480 | 200 | 100 |
| ChCl:Gly   | 200                 | 200 |                   | 200             | 200 | 200 | 100 |

**Table S7**

LLE data of MCR(1) - THN(2) - UND(3) - Emimcl(4).

| No. | Raffinate phase |        |        |       | Extract phase |        |        |        |
|-----|-----------------|--------|--------|-------|---------------|--------|--------|--------|
|     | $x_1$           | $x_2$  | $x_3$  | $x_4$ | $x_1$         | $x_2$  | $x_3$  | $x_4$  |
| 1   | 0.0002          | 0.2113 | 0.7884 | 0     | 0.4529        | 0.0429 | 0.0511 | 0.4530 |
| 2   | 0.0005          | 0.3622 | 0.6373 | 0     | 0.4445        | 0.0735 | 0.0390 | 0.4430 |
| 3   | 0.0006          | 0.4803 | 0.5190 | 0     | 0.4302        | 0.0977 | 0.0417 | 0.4304 |
| 4   | 0.0010          | 0.5597 | 0.4393 | 0     | 0.4254        | 0.1138 | 0.0349 | 0.4258 |
| 5   | 0.0007          | 0.6227 | 0.3766 | 0     | 0.4165        | 0.1332 | 0.0352 | 0.4150 |
| 6   | 0.0008          | 0.6677 | 0.3315 | 0     | 0.4125        | 0.1420 | 0.0326 | 0.4129 |
| 7   | 0.0008          | 0.7042 | 0.2951 | 0     | 0.4043        | 0.1593 | 0.0317 | 0.4047 |
| 8   | 0.0008          | 0.7354 | 0.2638 | 0     | 0.4000        | 0.1686 | 0.0308 | 0.4006 |
| 9   | 0.0009          | 0.7603 | 0.2388 | 0     | 0.4029        | 0.1674 | 0.0262 | 0.4035 |

**Table S8**Binary interaction parameters  $\Delta b_{ij}$ ,  $\Delta b_{ji}$  for NRTL model.

| <i>i-j</i>                           | $\Delta b_{ij}/(\text{kJ}\cdot\text{mol}^{-1})$ | $\Delta b_{ji}/(\text{kJ}\cdot\text{mol}^{-1})$ |
|--------------------------------------|-------------------------------------------------|-------------------------------------------------|
| MCR(1) - THN(2) - UND(3) - EmimCl(4) |                                                 |                                                 |
| 1-2                                  | -107.32                                         | 852.96                                          |
| 1-3                                  | 2151.61                                         | -849.56                                         |
| 1-4                                  | -2462.04                                        | 2132.96                                         |
| 2-3                                  | 274.41                                          | -113.49                                         |
| 2-4                                  | 1050.14                                         | 2037.90                                         |
| 3-4                                  | 1334.40                                         | 1474.17                                         |

**Table S9**

Modified Group Contribution method.

|                                 | Model equation                                                                                                                                                                      | Constants                                                                                                                             |
|---------------------------------|-------------------------------------------------------------------------------------------------------------------------------------------------------------------------------------|---------------------------------------------------------------------------------------------------------------------------------------|
| The method                      | $T_b = 198.2 + \sum n_i \Delta T_b$                                                                                                                                                 | $A = 0.5703$                                                                                                                          |
|                                 | $T_c = \frac{T_b}{A + B \sum n_i \Delta T_c - (\sum n_i \Delta T_c)^2}$                                                                                                             | $B = 1.0121$                                                                                                                          |
|                                 | $P_c = \frac{M}{C + (\sum n_i \Delta P_c)^2}$                                                                                                                                       | $C = 0.2573$                                                                                                                          |
|                                 | $V_c = D + \sum n_i \Delta V_c$                                                                                                                                                     | $D = 6.75$                                                                                                                            |
| Density model for testing       | $\rho(\text{g/cm}^3) = (A/B) + (2/7) \cdot \left\{ (A \cdot \ln B) / B \right\} \frac{T - T_b}{T_c - T_b}$                                                                          | $A = a + b \cdot M / V_c$<br>$B = (c / V_c + d / M) \cdot V_c^\delta$<br>$A = 0.3411, b = 2.0443, c = 0.5386, d = 0.0393, e = 1.0476$ |
| Critical compressibility factor | $Z_c = P_c V_c / RT_c$                                                                                                                                                              | $R = 84.31 \text{ (bar cm}^3/\text{mol K)}$                                                                                           |
| Acentric factor                 | $\omega = \frac{(T_b - 43)(T_c - 43)}{(T_c - T_b)(0.7T_c - 43)} \frac{P_c}{\text{Log}[P_b]}$<br>$-\frac{(T_c - 43)}{(T_c - T_b) \text{Log}[P_b]} + \frac{P_c}{\text{Log}[P_b]} - 1$ | $P_b = 1.01325 \text{ bar}$                                                                                                           |

In the equations,  $M$  is in g/mol,  $T_b$  and  $T_c$  in K,  $P_c$  in bar and  $V_c$  in (cm<sup>3</sup>/mol).



**Table S10**

Physical properties of the EmimCl at 298.15 K and atmospheric pressure.

| Items    | Units                | EmimCl |
|----------|----------------------|--------|
| $T_c$    | K                    | 748.6  |
| $V_c$    | mL mol <sup>-1</sup> | 454.5  |
| $P_c$    | bar                  | 34.17  |
| $T_b$    | K                    | 512.3  |
| $Z_c$    |                      | 0.2495 |
| $\omega$ |                      | 0.4165 |

**Table S11**

Basis of economics and equipment sizing.

| Items                                                                                  | Formulas and values                                                                                                                                                                                                                                                                              |
|----------------------------------------------------------------------------------------|--------------------------------------------------------------------------------------------------------------------------------------------------------------------------------------------------------------------------------------------------------------------------------------------------|
| column vessel                                                                          | column diameter = Aspen tray sizing<br>column length = $N_T$ trays with 2 ft spacing plus 20% extra length<br>investment cost = $17640D^{1.066}L^{0.802}$ , where $D$ and $L$ are in m                                                                                                           |
| Reboilers                                                                              | heat-transfer coefficient ( $K_R$ ) = $0.568 \text{ kW}/(\text{K}\cdot\text{m}^2)$<br>differential temperature ( $\Delta T_R$ ) = steam temperature – base temperature<br>$A_R = \frac{Q_R}{K_R \times \Delta T_R}$<br>capital cost = $7296 (A_R)^{0.65}$                                        |
| Coolers                                                                                | heat-transfer coefficient ( $K_C$ ) = $0.852 \text{ kW}/(\text{K}\cdot\text{m}^2)$<br>differential temperature ( $\Delta T_C$ ) = log-mean temperature difference of inlet and outlet temperature differences<br>$A_C = \frac{Q_C}{K_C \times \Delta T_C}$<br>capital cost = $7296 (A_C)^{0.65}$ |
| Extraction column                                                                      | length: $N_T$ trays with 4 ft HETP plus additional 3 ft at the top and 3 ft at the bottom<br>capital cost = $17640(D)^{1.066} (L)^{0.802}$ ( $D$ and $L$ are in meters)                                                                                                                          |
| Utilities cost                                                                         | low pressure steam (160 °C) = \$7.78/GJ<br>medium pressure steam (184 °C) = \$8.22/GJ<br>high pressure steam (254 °C) = \$9.88/GJ<br>cooling water = \$0.354/GJ<br>cold water = \$0.443/GJ<br>Electricity = \$0.094/kW·h                                                                         |
| Vacuum system                                                                          | $W^v [1\text{b/h}] = 5 + (0.0298 + 0.03088 \ln P - 0.0005733 (\ln P)^2) V^{0.66}$<br>Vacuum system cost [\$] = $1690 \times 1.8 \times (W^v/P)^{0.41}$<br><br>$P$ [torr] is the vacuum pressure and $V [ft^3]$ is the volume of the vessel                                                       |
| TAC = (investment cost/ plant life time) + operating cost<br>plant life time = 3 years |                                                                                                                                                                                                                                                                                                  |

**Table S12****Data of FIGURE 2(A).**

| HBA    | <i>D</i> | <i>S</i> | <i>PI</i> |
|--------|----------|----------|-----------|
| 2-mim  | 1.06     | 6.91     | 7.32      |
| TEPC   | 14.44    | 227.37   | 3283.22   |
| TEAC   | 21.25    | 196.05   | 4166.06   |
| TPAC   | 8.85     | 193.90   | 1716.02   |
| emimCl | 8.11     | 166.11   | 1347.15   |
| TMPC   | 8.59     | 155.42   | 1335.06   |
| ETPPB  | 8.20     | 74.69    | 612.46    |
| MTPPB  | 19.65    | 123.11   | 2419.11   |
| TEMAC  | 9.77     | 118.20   | 1154.81   |
| Lcar   | 8.14     | 115.95   | 943.83    |
| TMAB   | 7.22     | 109.51   | 790.66    |
| TEPB   | 10.97    | 102.86   | 1128.37   |
| TBAC   | 8.50     | 101.68   | 864.28    |
| ChBr   | 10.11    | 96.05    | 971.07    |
| ChCl   | 9.22     | 91.68    | 845.29    |
| TPAB   | 6.59     | 91.00    | 599.69    |
| emimbr | 7.48     | 87.86    | 657.19    |
| BTMAC  | 6.51     | 68.68    | 447.11    |
| TMAC   | 4.73     | 65.92    | 311.80    |
| bmimcl | 6.43     | 46.59    | 299.57    |
| TEAB   | 5.24     | 42.50    | 222.70    |
| IM     | 0.96     | 16.34    | 15.69     |
| TBPC   | 2.50     | 5.07     | 12.68     |
| bmimbr | 1.70     | 2.98     | 5.07      |
| TMAHC  | 1.23     | 2.92     | 3.59      |
| EAHC   | 1.01     | 2.88     | 2.91      |

**Table S13**

The lowest molar ratio of liquid DES synthesized by various HBA and MCR at 25 °C.

| HBA type | L-car | EmimCl | TEMAC | TEAC  | TPAC  | ChCl  | TEPC  |
|----------|-------|--------|-------|-------|-------|-------|-------|
| HBA:MCR  | 1:1.8 | 1:0.4  | 1:2.1 | 1:1.2 | 1:1.1 | 1:1.4 | 1:1.5 |

**Table S14**

The interaction energy between molecules in different systems.

| Molecular pair                                                                      | Van der Waals interaction ( $E_{vdW}$ ) | Electrostatic interactions ( $E_{elec}$ ) | Total nonbonded interactions ( $E_{total}$ ) |
|-------------------------------------------------------------------------------------|-----------------------------------------|-------------------------------------------|----------------------------------------------|
| EmimCl:MCR(1:0.4), (A:Emim <sup>+</sup> , B:Cl <sup>-</sup> , C:MCR, D:THN, E:UND)  |                                         |                                           |                                              |
| AB                                                                                  | -881.75                                 | 0.18                                      | -881.57                                      |
| AC                                                                                  | 1.26                                    | -13.93                                    | -12.68                                       |
| BC                                                                                  | -45.96                                  | 4.05                                      | -41.91                                       |
| AD                                                                                  | 1.14                                    | -1.45                                     | -0.31                                        |
| BD                                                                                  | -1.44                                   | -0.17                                     | -1.61                                        |
| AE                                                                                  | -0.28                                   | -0.27                                     | -0.55                                        |
| BE                                                                                  | 0.28                                    | -0.04                                     | 0.24                                         |
| CD                                                                                  | -0.42                                   | -7.54                                     | -7.96                                        |
| CE                                                                                  | -0.01                                   | -4.46                                     | -4.47                                        |
| AB-C                                                                                | -44.70                                  | -9.88                                     | -54.59                                       |
| (AB+1.4×C)-DE                                                                       | -0.90                                   | -18.73                                    | -19.63                                       |
| ChCl:MCR(1:1.4), (A:Ch <sup>+</sup> , B:Cl <sup>-</sup> , C:MCR, D:THN, E:UND)      |                                         |                                           |                                              |
| AB                                                                                  | -781.21                                 | 5.93                                      | -775.29                                      |
| AC                                                                                  | 5.20                                    | -12.42                                    | -7.22                                        |
| BC                                                                                  | -46.90                                  | 4.07                                      | -42.83                                       |
| AD                                                                                  | 0.55                                    | -0.70                                     | -0.14                                        |
| BD                                                                                  | -0.82                                   | -0.10                                     | -0.91                                        |
| AE                                                                                  | -0.31                                   | -0.37                                     | -0.68                                        |
| BE                                                                                  | 0.31                                    | -0.06                                     | 0.25                                         |
| CD                                                                                  | -0.62                                   | -7.65                                     | -8.27                                        |
| CE                                                                                  | -0.01                                   | -4.84                                     | -4.84                                        |
| AB-C                                                                                | -41.70                                  | -8.35                                     | -50.05                                       |
| (AB+2.4×C)-DE                                                                       | -1.77                                   | -31.18                                    | -32.96                                       |
| ChCl:Gly(1:1), (A:Ch <sup>+</sup> , B:Cl <sup>-</sup> , C:MCR, D:THN, E:UND, F:Gly) |                                         |                                           |                                              |
| AB                                                                                  | -831.25                                 | 4.60                                      | -826.65                                      |
| AF                                                                                  | -3.57                                   | -15.66                                    | -19.23                                       |
| BF                                                                                  | -82.25                                  | 9.02                                      | -73.23                                       |
| AC                                                                                  | 1.99                                    | -5.35                                     | -3.36                                        |
| BC                                                                                  | -25.87                                  | 2.06                                      | -23.81                                       |
| FC                                                                                  | 0.52                                    | -4.57                                     | -4.05                                        |

---

|        |        |        |        |
|--------|--------|--------|--------|
| AD     | 0.77   | -1.41  | -0.63  |
| BD     | -1.31  | -0.21  | -1.51  |
| FD     | -0.10  | -2.03  | -2.13  |
| AE     | -0.38  | -0.50  | -0.88  |
| BE     | 0.38   | -0.09  | 0.29   |
| FE     | 0.00   | -1.09  | -1.10  |
| CD     | -0.68  | -9.13  | -9.81  |
| CE     | -0.01  | -5.63  | -5.63  |
| ABF-C  | -23.36 | -7.86  | -31.23 |
| ABF-DE | -1.33  | -20.07 | -21.40 |

---

**Table S15**

Atomic contribution to dispersion energy.

| Atom Type         | Dispersion energy | Atom Type | Dispersion energy | Atom Type | Dispersion energy | Atom Type       | Dispersion energy |
|-------------------|-------------------|-----------|-------------------|-----------|-------------------|-----------------|-------------------|
| Emim <sup>+</sup> |                   | THN       |                   | UND       |                   | Ch <sup>+</sup> |                   |
| N1                | -1.85             | C1        | -1.73             | C1        | -0.97             | C1              | -2.07             |
| C1                | -2.07             | C2        | -1.56             | C2        | -1.29             | N1              | -1.98             |
| C2                | -1.82             | C3        | -1.56             | C3        | -1.52             | C2              | -1.63             |
| C3                | -1.53             | C4        | -1.73             | C4        | -1.57             | C3              | -1.81             |
| N2                | -1.67             | C5        | -2.46             | C5        | -1.59             | C4              | -1.59             |
| C4                | -1.69             | C6        | -1.91             | C6        | -1.58             | C5              | -1.57             |
| C5                | -1.26             | C7        | -1.61             | C7        | -1.58             | O1              | -0.89             |
| C6                | -1.27             | C8        | -1.61             | C8        | -1.57             | H1              | -0.79             |
| H1                | -0.78             | C9        | -1.91             | C9        | -1.52             | H2              | -0.95             |
| H2                | -0.61             | C10       | -2.46             | C10       | -1.29             | H3              | -0.79             |
| H3                | -0.65             | H1        | -0.65             | C11       | -0.97             | H4              | -0.60             |
| H4                | -0.58             | H2        | -0.70             | H1        | -0.39             | H5              | -0.65             |
| H5                | -0.54             | H3        | -0.56             | H2        | -0.45             | H6              | -0.85             |
| H6                | -0.42             | H4        | -0.69             | H3        | -0.45             | H7              | -0.73             |
| H7                | -0.66             | H5        | -0.69             | H4        | -0.59             | H8              | -0.61             |
| H8                | -0.55             | H6        | -0.56             | H5        | -0.59             | H9              | -0.63             |
| H9                | -0.48             | H7        | -0.65             | H6        | -0.68             | H10             | -0.73             |
| H10               | -0.61             | H8        | -0.70             | H7        | -0.68             | H11             | -0.62             |
| H11               | -0.48             | H9        | -0.61             | H8        | -0.69             | H12             | -0.61             |
| MCR               |                   | H10       | -0.50             | H9        | -0.69             | -0.69           | H13               |
| C1                | -1.77             | H11       | -0.50             | H10       | -0.70             | H14             | -0.59             |
| C2                | -1.90             | H12       | -0.61             | H11       | -0.70             | Gly             |                   |
| C3                | -1.86             |           |                   | H12       | -0.70             | C1              | -1.19             |
| C4                | -1.71             |           |                   | H13       | -0.70             | C2              | -1.34             |
| C5                | -1.66             |           |                   | H14       | -0.70             | C3              | -1.15             |
| C6                | -1.60             |           |                   | H15       | -0.70             | O1              | -0.75             |
| H1                | -0.58             |           |                   | H16       | -0.69             | O2              | -0.95             |
| H2                | -0.62             |           |                   | H17       | -0.69             | O3              | -0.70             |
| H3                | -0.54             |           |                   | H18       | -0.68             | H1              | -0.55             |
| H4                | -0.50             |           |                   | H19       | -0.68             | H2              | -0.52             |
| C7                | -1.14             |           |                   | H20       | -0.59             | H3              | -0.61             |
| H5                | -0.47             |           |                   | H21       | -0.59             | H4              | -0.50             |
| H6                | -0.48             |           |                   | H22       | -0.39             | H5              | -0.54             |
| H7                | -0.48             |           |                   | H23       | -0.45             | H6              | -0.34             |
| O1                | -0.80             |           |                   | H24       | -0.45             | H7              | -0.49             |
| H8                | -0.42             |           |                   |           |                   | H8              | -0.43             |

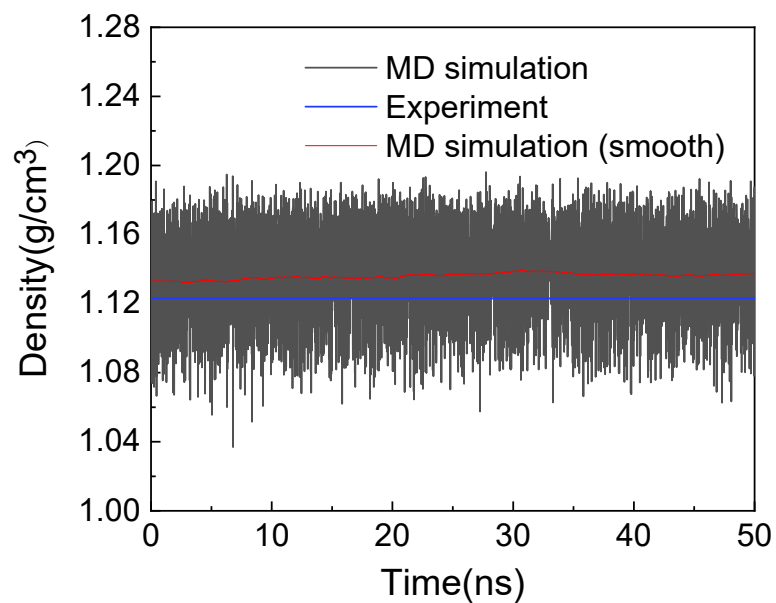

**Fig. S1.** The experimental and MD simulated density values of EmimCl at 298.15 K (Experiment: 1.123, MD: 1.138).

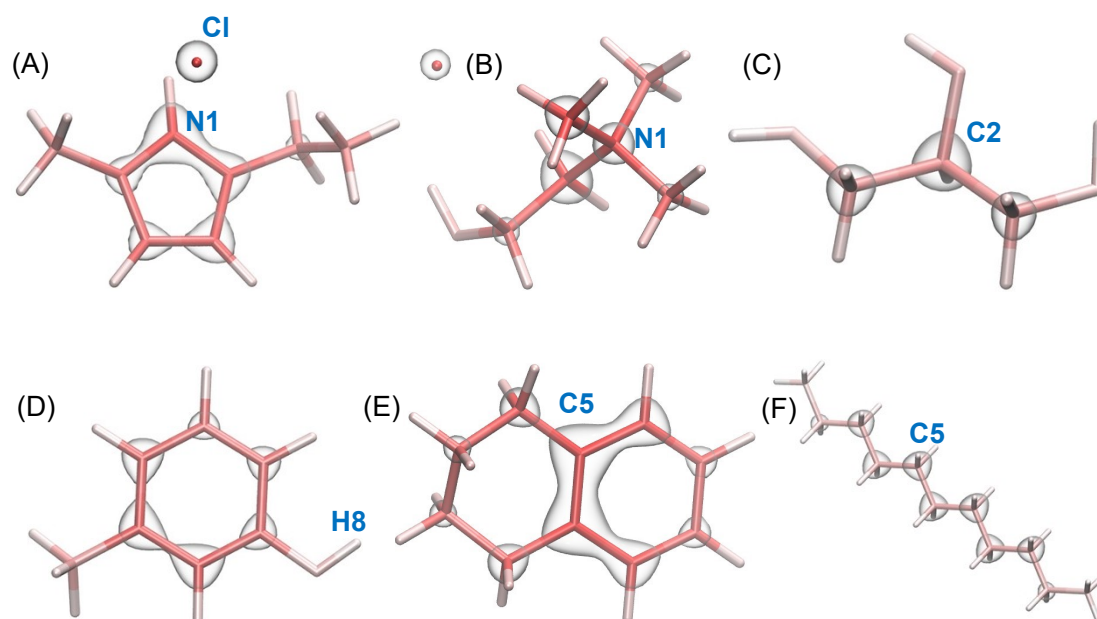

**Fig. S2.** Dispersion energy density diagram of EmimCl (A), ChCl (B), Gly (C), MCR (D), THN (E), UND (F), and their reference atoms in RDF analysis.
